# Supplementary material for: Patterns and Intensities of Near-Infrared and Short-Wavelength Fundus Autofluorescence in Choroideremia Probands and Carriers
Source: PubMed Central journal article supplement — Invest Ophthalmol Vis Sci. 2019 Sep 5;60(12):3752–61. doi: 10.1167/iovs.19-27366 (PMC6735265; doi:10.1167/iovs.19-27366), 2019-09-05
Supplement: iovs-60-10-13_s02.pdf [file iovs-60-10-13_s02.pdf]

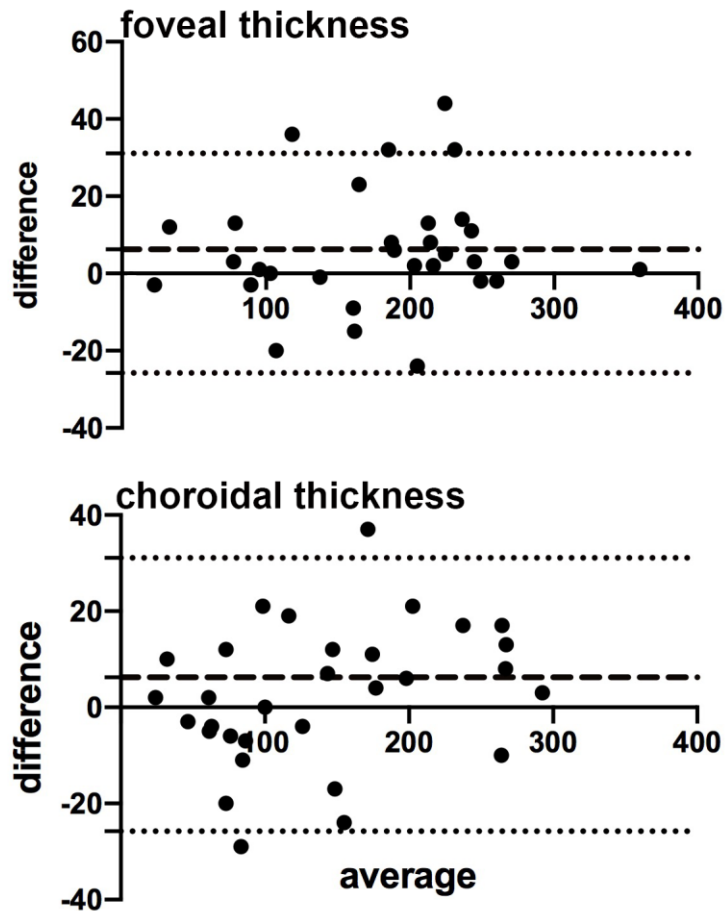

Supplementary Figure 1. Bland-Altman plots comparing foveal thickness (A) and choroidal thickness (B) measurements by two operators. The differences between the two measurements are plotted as a function of the average of the two measurements. The horizontal dashed lines represent the mean of the differences (bias) and horizontal dotted lines represent the 95% confidence intervals of the differences.
